# Supplementary material for: Whole Blood Holding Time Prior to Plasma Processing Alters microRNA Expression Profile
Source: Front Genet. 2022 Jan 14;12:818334. doi: 10.3389/fgene.2021.818334 (PMC8795683; doi:10.3389/fgene.2021.818334)
Supplement: Supplementary file 2 [file DataSheet1.xlsx]

## Sheet: Cq Values
Samples	1	2	3	4	5	1	2	3	4	5	1	2	3	4	5	1	2	3	4	5
Time points	30min	30min	30min	30min	30min	2h	2h	2h	2h	2h	6h	6h	6h	6h	6h	24h	24h	24h	24h	24h
Hemolysis (A414nm)	0.113	0.127	0.097	0.1	0.127	0.185	0.182	0.141	0.247	0.197	0.157	0.241	0.23	0.315	0.189	0.418	0.259	0.245	0.244	0.185
hsa-miR-374a-5p	27.5794	40	27.1643	40	40	27.672	31.7758	31.1565	31.0493	40	27.7906	27.7439	28.2665	33.7916	40	29.889	28.8299	40	31.9794	30.059
hsa-miR-199a-5p	24.3338	28.1813	24.7373	26.6875	27.0832	25.9952	32.3568	30.4095	40	40	24.6046	26.8199	27.7115	31.7595	24.8505	40	26.1569	29.5741	29.3269	27.4322
hsa-miR-15b-3p	34.1807	40	28.1073	26.5174	31.1145	27.4432	31.8048	31.5415	31.1037	28.8558	27.7296	26.9399	40	34.2073	40	29.639	27.7829	40	30.9233	31.2924
hsa-miR-22-5p	40	40	28.2493	28.3782	30.8703	28.2922	32.6608	32.4035	32.5616	28.6441	27.7306	28.2909	40	34.8477	28.6433	40	28.3049	30.8601	31.6222	30.9896
hsa-miR-33a-5p	26.9918	29.2541	27.3797	29.7134	29.445	40	40	30.8815	33.2717	27.0036	39.7216	30.6539	33.6045	32.7535	26.7961	35.6343	30.1132	30.9564	32.1007	25.2355
hsa-let-7a-5p	22.4505	23.5055	21.9397	40	24.9399	23.6922	23.2445	25.0546	27.8799	22.6239	23.0956	22.9039	27.8505	27.8253	22.4884	21.8793	22.2152	25.5374	27.2551	20.7551
hsa-miR-127-3p	28.3067	40	28.5933	31.0944	30.4621	29.5458	37.8298	34.4605	34.7838	28.1997	28.9476	30.9539	40	36.2072	28.2665	30.324	30.3879	34.3961	34.9047	31.1253
hsa-let-7i-5p	24.5673	25.4352	24.7977	25.5978	27.6124	24.6044	24.5605	27.0642	29.4505	25.404	24.9866	23.4589	29.0195	30.0471	25.2337	23.0663	40	27.0414	28.7935	23.3758
hsa-miR-30e-5p	24.7102	25.9105	24.3627	24.5944	27.429	24.6709	25.0705	27.0548	28.7932	25.1515	24.7756	23.8979	28.6705	29.1202	24.978	22.8713	40	26.2484	27.6926	23.3031
hsa-miR-629-5p	30.2573	40	32.4533	40	34.6129	29.6544	34.2658	33.2285	35.7889	32.4458	30.5786	30.0839	40	36.1298	31.7948	40	28.9719	31.9751	32.5533	34.0586
hsa-miR-425-5p	25.3068	27.5903	25.0673	24.4075	28.1337	24.5931	28.5568	28.6015	29.0157	25.9604	24.5576	23.9999	25.1705	31.4708	25.8409	40	24.1169	26.9131	28.2915	28.5031
hsa-miR-335-3p	29.9583	40	34.6043	31.4654	32.7671	32.0545	36.3418	34.7885	35.9834	30.4791	29.7706	33.6579	36.0765	38.7893	30.2993	40	40	40	35.98	33.2209
hsa-miR-485-3p	28.2582	32.5942	29.4057	33.1172	31.6295	30.9146	40	34.4901	36.0524	29.3239	29.4766	31.3159	37.5285	34.9595	28.9654	28.7773	29.9872	34.3924	37.5243	27.3989
hsa-miR-1260a	26.271	26.1983	25.1763	26.0243	28.4158	25.2907	29.4428	28.3255	30.3432	27.467	25.0126	25.2399	40	31.8325	26.4234	26.326	24.6329	28.0701	28.969	29.1055
hsa-miR-29b-3p	27.1818	40	26.9083	26.0843	29.6626	26.5107	30.8718	30.5175	30.2911	27.5736	35.1436	26.9219	26.9725	32.8536	27.4567	28.296	25.8129	28.2151	29.2434	29.8722
hsa-miR-27a-3p	27.0433	28.5633	26.6133	27.0961	28.503	27.3504	31.7318	31.5355	31.0238	26.1633	40	28.3209	29.3235	32.5228	26.8439	34.919	28.6509	30.6471	30.9496	29.1079
hsa-miR-454-3p	27.5031	27.8583	27.5873	25.8483	30.2044	26.2674	29.9038	30.5915	30.0565	28.1804	27.4396	25.4739	27.7255	32.9073	28.2917	29.312	27.8979	40	30.4621	30.6753
hsa-miR-543	28.6043	32.7263	29.3483	31.5123	30.8526	30.2623	37.9338	37.0975	36.4082	28.7858	28.8786	31.8739	33.8775	37.4462	28.8032	31.22	31.3409	34.7951	35.037	31.554
hsa-miR-136-5p	26.1328	29.9713	26.5033	29.3335	28.2456	27.3917	35.9138	33.4515	33.8067	26.2649	26.1906	29.0879	30.0965	34.9437	26.0974	28.057	29.0499	31.6871	32.6551	28.9632
hsa-miR-376a-3p	29.0201	33.3583	30.4733	32.052	31.0059	30.4192	38.1618	36.4745	37.2756	28.7147	29.1736	32.4939	34.5995	37.4762	28.8017	30.949	31.5139	34.8381	35.2203	31.4575
hsa-miR-136-3p	28.8575	33.0373	29.7013	31.5597	31.9152	31.2644	35.7288	40	35.946	29.5807	29.5256	30.8319	32.8985	37.3435	29.5149	31.663	31.4159	34.4821	36.233	32.3176
hsa-miR-495-3p	28.6535	34.5463	30.6403	31.4785	31.3622	30.1354	38.4288	36.5765	35.8701	29.3659	28.9696	31.6859	33.6435	37.3604	29.0966	30.655	32.7379	35.1491	34.99	31.6974
hsa-miR-376c-3p	26.8534	32.2523	28.2583	30.5125	29.7327	28.6278	34.8838	34.6655	34.878	27.6292	27.0726	30.7479	31.5655	36.3434	27.4927	29.138	29.2659	32.4821	34.3206	30.0964
hsa-miR-382-5p	28.0635	32.8213	28.2143	31.5969	30.3794	29.8367	35.4408	33.9905	35.527	28.2746	28.6486	32.2559	31.4555	36.6403	28.0849	29.982	30.3019	33.8671	34.4221	30.6235
hsa-miR-150-5p	25.6274	26.1647	25.9727	27.187	30.1522	25.5667	26.0035	28.0946	31.1479	28.4297	25.2676	24.4889	30.1975	30.8189	27.665	22.6353	20.5222	25.2444	27.7269	24.7256
hsa-miR-30e-3p	30.0439	32.6083	29.8343	40	33.1226	30.9128	35.7588	34.3345	34.8708	30.9326	30.1056	30.0729	32.8235	36.7122	30.8747	31.552	30.3039	33.8611	34.2257	33.6489
hsa-miR-874-3p	31.5876	31.8703	30.6013	31.2963	34.0092	30.5102	36.1478	33.6135	35.1352	32.4058	29.8786	30.8749	31.9775	37.2031	31.7875	40	29.6259	32.7791	34.097	34.5232
hsa-miR-335-5p	32.5806	35.2103	35.5447	34.1657	33.9888	33.7537	34.9275	37.5618	38.3747	31.9731	32.5216	35.4099	39.3975	37.5084	31.0223	31.4093	32.2082	35.1784	36.7891	29.756
hsa-miR-221-3p	23.4314	26.6411	23.5947	27.0109	26.7691	25.5474	27.7115	28.1816	30.7397	24.4314	24.4406	25.4289	30.6165	29.8949	24.3672	23.2253	23.5932	28.2544	29.3775	22.4695
hsa-miR-205-5p	35.886	30.6813	29.4133	31.0524	40	31.8311	33.0878	33.2415	35.0061	34.1212	31.3806	29.4709	31.0315	36.2452	32.481	34.41	31.3369	32.6351	34.2235	35.7954
hsa-miR-122-5p	24.7652	26.5933	23.5087	28.0768	31.9258	24.7476	26.7875	26.4214	31.6266	29.9094	25.1566	26.0009	29.3315	31.0646	29.6936	25.3253	25.7422	28.1014	31.3269	28.8072
hsa-miR-146a-5p	25.5956	28.4989	25.4667	29.1721	28.5039	27.6148	28.8085	29.7	32.8129	26.1781	26.6596	27.6679	32.3995	32.1374	26.0162	25.2323	25.3562	29.3264	31.3607	24.228
hsa-miR-1	31.9352	34.9063	31.4463	32.9994	33.1821	37.1764	39.9018	37.7625	36.4259	31.6486	32.8036	32.3189	34.7705	38.2464	30.9594	33.852	32.7369	36.5841	36.3943	34.0117
hsa-miR-339-5p	27.2146	30.6033	26.7153	28.8038	29.42	28.9817	36.1138	32.5145	32.8668	27.4418	27.1856	29.0039	29.4425	34.3851	27.303	29.239	28.8989	31.1611	32.0078	29.9404
hsa-miR-151a-5p	24.4153	26.7482	24.2137	27.7848	27.5828	26.0917	26.5305	28.1215	31.4375	25.2077	25.2166	25.4669	30.6025	31.183	24.9269	24.0093	24.6662	28.3494	30.4587	23.3658
hsa-miR-154-5p	28.9753	33.6163	30.1743	33.403	31.8195	30.6499	36.6688	34.7995	35.49	29.5836	29.0076	31.2809	33.0295	37.0304	29.536	31.144	31.7709	34.5041	35.1222	32.0141
hsa-miR-409-3p	27.6249	32.3133	29.0823	30.5972	30.0534	29.9078	35.0528	33.8355	34.5481	27.9912	28.2036	30.7819	31.2475	35.786	27.9065	29.702	30.7269	33.0411	34.0324	30.6234
hsa-miR-199a-3p	24.7021	27.8121	24.8657	27.9711	28.18	26.8049	28.1625	29.6238	31.67	25.7934	26.1106	26.6799	31.9045	31.0233	25.5992	24.3513	25.3502	29.2354	30.3783	23.9296
hsa-miR-766-3p	27.3414	31.8003	27.3023	29.4242	29.5564	29.5271	34.1878	33.2985	33.8389	27.9226	27.8256	29.3669	31.5185	35.3352	27.6464	29.52	28.7659	32.1281	32.8448	30.3482
hsa-miR-223-3p	19.6358	22.2107	19.6237	22.2849	23.0956	20.8969	22.4445	22.996	25.9771	20.7662	20.1116	20.7859	25.4685	25.926	20.4997	18.5373	17.4652	22.3714	24.7965	18.8343
hsa-let-7e-5p	26.8536	29.3517	26.4747	29.777	29.2948	28.9043	30.7075	30.1773	33.3227	27.1443	27.7196	29.8759	33.2885	32.6959	26.8947	26.5133	27.3442	31.3784	32.3492	25.2317
hsa-miR-28-5p	26.5835	29.3483	26.2963	28.7647	29.0327	28.2324	34.2138	32.5655	32.4245	26.9897	26.9696	28.5169	29.4825	34.2293	26.8251	28.419	28.7979	31.3211	31.7934	29.4116
hsa-miR-326	28.5217	32.3923	28.5003	29.9021	30.629	29.7814	36.1488	33.1735	34.8765	28.6476	28.0496	31.3649	31.8025	35.406	28.5731	30.325	30.6629	33.0611	33.5081	31.0704
hsa-miR-197-3p	27.769	30.428	27.8737	30.1224	30.8797	28.4968	29.7955	31.3672	34.101	28.4375	27.9856	29.1459	33.7315	33.6697	28.2506	26.5893	26.1152	30.6334	32.6335	26.7453
hsa-miR-181a-5p	24.9113	26.1255	24.6637	28.0706	28.6671	26.3727	26.0425	27.9687	31.6687	26.3656	25.6796	25.3989	30.5915	31.2924	26.3478	24.4593	24.1872	28.4674	30.7861	24.4386
hsa-miR-125a-5p	26.4838	29.1357	25.7587	29.3176	29.1447	28.6135	29.9075	30.3353	32.8987	26.9278	27.5496	28.6129	33.2615	31.9885	26.6461	26.2813	27.3242	30.2474	32.0628	24.9244
hsa-miR-133a-3p	30.6702	34.2353	31.7333	31.6886	33.0904	31.922	36.4688	35.2935	36.3246	30.5307	30.8326	31.4049	38.1035	37.6588	30.5873	33.354	32.6729	34.6471	35.4091	33.4256
hsa-miR-106b-3p	30.6047	36.4513	30.0853	30.6031	32.5475	31.0235	37.1898	35.0885	35.293	30.3123	31.5926	31.9429	31.6215	37.5133	29.7829	32.339	31.1539	33.4351	34.1116	32.4906
hsa-miR-23a-3p	21.6582	23.9378	21.8527	24.7435	25.3197	23.2281	24.1825	25.408	28.4372	22.9295	22.4286	23.0769	27.9915	27.8619	22.7511	21.2933	21.1212	25.2974	27.4135	21.0964
hsa-let-7d-3p	26.7907	29.1546	26.5467	29.3381	29.9903	27.8812	28.8765	30.6815	33.1893	27.5633	27.5066	27.4339	32.4685	32.721	27.5378	26.3083	25.7442	29.6254	32.3673	25.8202
hsa-miR-133b	30.3399	31.9173	29.4023	31.65	32.3182	31.6774	37.9318	36.3715	34.9409	30.0893	30.8456	32.4299	31.4705	36.5152	30.4598	32.581	31.1389	35.0381	33.8004	33.1896
hsa-miR-584-5p	29.4255	32.3653	29.2363	30.5987	32.0487	30.2014	35.7458	34.1285	35.4508	29.846	29.7986	30.6159	31.6155	37.2177	29.919	31.218	31.8489	33.9301	34.8774	32.4331
hsa-miR-28-3p	27.9568	30.1093	27.7373	29.5623	30.4192	29.6918	33.4018	32.9625	33.7541	28.4368	28.1236	28.8069	31.4035	36.1306	28.356	29.823	28.2169	32.6561	32.5107	31.0827
hsa-miR-374b-5p	26.6233	29.7069	26.8977	29.3021	29.6972	28.0909	29.0515	30.9108	32.9307	27.389	27.4906	28.5259	33.2885	32.7233	27.2331	26.5343	27.7732	30.5334	32.4909	25.5565
hsa-miR-142-3p	21.5274	23.428	21.5477	24.0027	24.1552	22.9381	23.5205	25.3083	27.578	22.145	22.0766	22.7939	27.7375	27.2559	21.5451	21.1863	21.5022	25.0984	26.969	20.0216
hsa-miR-145-5p	26.5711	28.2002	26.1907	29.7615	30.0305	28.2859	28.2725	29.9567	32.966	27.7551	27.4306	27.9599	32.8265	32.4592	27.6779	26.3203	25.8592	30.0234	32.1944	25.9103
hsa-miR-342-3p	27.3375	27.9284	26.8847	28.7938	30.6921	27.5218	27.9495	29.961	32.7444	28.4145	27.4356	27.4269	32.7085	32.3979	28.1141	25.7203	23.6792	28.0714	30.5421	26.7389
hsa-miR-24-3p	22.5373	24.6936	22.0927	24.976	25.4397	24.0744	24.9095	25.9515	28.6784	23.2243	23.3916	23.6369	28.3575	28.5053	23.0047	21.8473	21.4722	25.8984	27.3771	21.3184
hsa-miR-103a-3p	21.589	23.2855	21.4817	24.2902	25.0344	22.1177	22.5305	24.3964	27.842	22.6779	22.2646	21.4329	26.4545	27.9539	22.4432	21.1083	21.5002	24.7914	27.3463	20.7512
hsa-miR-27b-3p	24.0497	26.348	24.0157	26.6275	26.7405	25.5578	26.5365	27.7633	30.2536	24.4649	24.8376	25.6659	30.2945	29.573	24.2549	23.8333	23.7782	27.7794	29.1989	22.626
hsa-miR-328-3p	27.9718	30.5383	27.4313	29.4324	30.7305	29.381	34.0878	33.0645	33.7708	28.1849	28.0746	29.3929	30.0375	35.2237	28.2328	29.86	28.8149	32.2361	32.9516	30.8543
hsa-miR-30c-5p	24.786	27.4285	25.2927	27.3732	27.9915	26.336	27.7015	28.6831	31.2687	25.4305	25.4156	26.4689	30.8485	30.8095	25.3349	24.4743	25.1602	28.3244	30.4415	23.9039
hsa-miR-365a-3p	31.7327	32.7121	32.2457	32.5737	35.3766	31.3998	32.1745	34.1875	36.9087	34.8039	31.2476	30.1359	36.6185	35.6215	34.5303	30.1573	28.4982	32.9864	35.6207	32.1433
hsa-miR-30b-5p	24.4533	26.6496	24.8567	27.2004	27.9645	25.6555	26.0925	27.8833	30.8486	25.5011	25.5556	25.1789	30.3025	31.0296	25.4506	24.6763	25.0222	27.6704	30.6208	23.8167
hsa-miR-26a-5p	24.4906	26.9132	24.3497	26.3752	26.8013	25.6461	26.8645	28.0956	30.1565	24.5137	25.2486	25.6669	30.5395	29.8049	24.1933	24.2903	24.4082	27.8494	29.5194	22.5982
hsa-miR-652-3p	25.3638	27.4208	25.5757	28.0133	28.893	26.3659	26.9715	28.6624	31.3079	26.6806	26.1046	25.6859	30.9275	31.6768	26.4413	24.6883	25.0242	28.9634	30.8897	24.781
hsa-miR-338-3p	27.7306	28.6898	27.1097	28.8149	30.135	28.9616	29.5205	30.528	32.3991	27.7297	27.9816	27.6239	33.3185	32.1051	27.6619	26.3343	24.4862	30.5904	31.3129	26.1253
hsa-miR-192-5p	26.958	27.9056	26.8017	27.4246	32.5493	26.393	27.0485	28.9852	31.3381	30.4686	26.8516	25.6739	30.6475	31.8969	30.0464	25.5253	25.0072	28.5044	30.9045	27.7576
hsa-miR-215-5p	28.1254	28.5998	28.0097	28.3681	33.9761	27.0632	28.2685	30.1969	32.1193	31.5745	27.9566	26.9199	31.6305	32.8534	30.9412	26.4463	26.2972	29.4534	31.9713	29.0638
hsa-miR-191-5p	23.7985	26.4373	23.6537	25.7172	26.5868	25.2673	26.1215	26.9475	29.5407	24.1996	24.6296	24.6989	29.2975	29.677	24.0068	23.2403	22.7952	26.8714	28.6261	22.3114
hsa-miR-193a-5p	31.5387	31.6373	30.9883	31.3567	35.6195	31.001	34.5698	33.7755	35.5727	35.0116	31.0546	31.2879	31.6835	37.9554	34.0575	32.399	29.4929	33.2771	34.1256	36.6916
hsa-miR-139-5p	27.697	29.9029	26.2997	30.2095	30.9565	29.5731	31.4785	31.1256	34.032	28.5899	28.8436	28.9129	33.5195	32.9489	28.2927	27.5483	28.4372	30.8344	32.9247	26.8533
hsa-miR-25-3p	23.6804	24.1003	23.1927	23.3449	27.8805	22.5952	22.9565	24.9617	27.3083	25.672	23.1036	21.7479	26.8255	28.3524	25.387	20.9293	20.6732	24.5284	27.0027	23.502
hsa-let-7f-5p	24.1689	25.739	24.2547	26.5176	26.8616	25.5341	25.4505	27.5276	30.0171	24.4015	25.1366	24.9949	29.7915	29.8003	24.2341	24.1223	24.4582	27.3974	29.7246	22.6149
hsa-miR-660-5p	27.4606	27.5423	26.4553	25.7775	31.2468	25.8987	29.7128	29.7325	30.2117	28.855	26.2176	24.9869	26.2275	32.9722	28.8508	26.966	25.2969	27.7561	29.4095	31.1739
hsa-miR-423-3p	24.8565	28.0953	24.7393	26.0491	27.1171	26.3418	31.3508	29.6035	30.2005	25.2735	24.9996	26.3099	27.1995	32.0585	25.0311	26.446	25.4409	28.7861	29.4921	27.5833
hsa-miR-140-3p	25.5376	26.1643	25.5373	23.7468	29.634	24.2805	28.0358	28.3065	28.1484	27.3485	24.3946	23.2989	24.8865	31.1714	27.4291	24.923	23.5959	26.5331	27.3752	29.6577
hsa-miR-148b-3p	25.7689	28.0699	25.9417	27.4645	28.8007	26.3518	27.4745	29.2703	31.2869	26.3567	26.1046	26.1329	30.8205	31.6121	26.4195	24.7453	24.6532	28.1344	30.6758	24.6769
hsa-miR-126-3p	21.6955	23.2377	20.9707	23.8704	24.28	23.0907	23.0545	24.5547	27.4779	22.0119	22.5126	22.0179	27.1495	27.0286	21.7181	21.3723	21.5652	24.8344	26.7155	20.038
hsa-miR-363-3p	27.298	27.8013	27.0933	25.5315	31.215	25.5147	29.6578	29.8015	29.8973	29.0627	26.0156	25.2109	26.0935	32.8974	29.0795	26.756	25.8019	27.7661	29.4787	31.3102
hsa-miR-301a-3p	26.9646	28.7628	26.8217	28.8638	30.0443	27.1171	28.5965	30.1863	32.3613	27.7543	27.5426	27.4869	32.2295	32.9858	27.4331	26.5253	26.5742	29.8304	32.355	25.9495
hsa-miR-152-3p	28.5874	30.4391	27.2197	30.5255	31.0733	29.7937	30.4395	31.149	34.6581	28.8798	29.1026	30.5849	33.8595	33.5302	28.7131	27.9613	27.9022	31.2844	33.3968	27.2235
hsa-miR-331-3p	27.8285	29.8902	27.5427	29.2536	30.5572	28.8012	29.8025	30.8152	32.9254	28.1765	28.3596	28.3959	33.3845	33.5455	27.88	27.6433	27.6252	31.0284	33.1567	26.2647
hsa-miR-339-3p	29.3841	32.0483	28.3283	30.8816	31.8378	30.4972	35.0118	33.4835	35.1605	30.0829	29.8926	31.3309	30.8855	36.9267	29.7099	30.903	30.3449	32.5261	33.9325	32.4756
hsa-miR-128-3p	28.345	30.5009	28.1457	29.98	31.2893	28.9888	30.0515	31.6871	33.8573	28.8129	28.8146	28.9419	33.6245	33.6218	29.0287	27.1703	27.1942	31.3494	32.8123	27.2427
hsa-miR-99b-5p	27.7245	29.8047	27.1127	29.2991	29.9182	30.0442	30.4865	31.2647	33.1982	27.7115	28.4466	28.8619	33.6055	32.9682	27.478	27.5373	28.9642	30.9844	32.4244	26.068
hsa-miR-151a-3p	27.8616	30.0403	27.5723	28.1491	29.1872	28.7236	33.1648	32.2675	32.9185	26.9929	27.9556	28.3359	29.3915	34.4819	26.9629	29.344	28.3799	30.9631	31.6431	29.4705
hsa-miR-483-5p	31.5328	31.0483	30.6663	32.4729	34.5218	31.0118	34.4358	34.4825	35.9617	34.6124	31.0566	30.6709	31.9405	37.7493	34.0659	33.762	31.0579	34.8531	35.457	36.4941
hsa-miR-99a-5p	30.232	30.9222	30.2027	31.9014	34.0037	30.7495	30.7955	32.778	36.1383	31.7559	30.9696	30.5239	35.3125	35.5287	31.4943	30.3973	29.2122	32.4814	36.0311	29.8699
hsa-miR-195-5p	30.6837	31.0429	29.8287	31.7644	33.541	31.2875	31.0225	35.2167	35.7028	31.8158	30.7356	29.8879	35.9065	35.2057	31.3323	31.1983	29.9332	34.0184	34.7249	29.296
hsa-miR-16-5p	19.707	20.868	21.112	19.808	20.888	19.022	19.524	20.676	17.899	20.781	18.971	19.958	18.753	17.716	20.38	17.146	19.003	18.63	18.729	20.223
hsa-miR-23b-3p	23.458	26.2283	23.8003	25.1469	26.1957	24.773	29.6208	28.6575	29.1644	24.0693	23.5246	25.2799	26.2065	30.6414	24.0151	25.336	24.6159	27.6061	28.3022	26.7484
hsa-miR-130a-3p	26.2332	28.7053	25.2963	26.8032	28.5501	27.0034	30.8968	30.5485	31.2146	26.4458	26.0436	26.1349	27.2855	33.1686	26.2169	27.173	26.0039	28.7891	30.2014	28.8998
hsa-miR-30d-5p	24.3535	26.4744	23.9287	25.8049	27.1787	25.6083	26.0605	27.5675	29.745	24.8677	24.9486	24.8269	29.6205	29.8592	24.6833	23.6543	23.6302	27.1254	28.9421	22.9371
hsa-miR-146b-5p	30.5096	32.7153	29.8853	30.2655	32.3349	30.8735	35.6748	34.7165	34.6838	30.4216	30.1506	30.8409	31.9775	36.8731	30.2179	30.924	28.6989	31.5841	33.5759	32.6322
hsa-miR-324-3p	27.4562	28.9223	27.3993	27.08	30.9299	26.6963	30.7678	30.9065	31.3303	28.9622	26.8846	26.2059	27.6875	34.3323	28.7502	28.234	26.6989	29.7031	31.2135	31.2604
hsa-miR-142-5p	24.6149	27.4863	25.1343	25.4409	26.9877	24.8795	30.1098	29.4805	29.5727	24.8588	24.3496	25.5149	26.3955	31.677	24.8296	25.886	24.7409	27.4331	28.7759	27.4979
hsa-miR-324-5p	27.4881	29.6046	27.1577	29.1811	30.3277	28.3289	29.2935	30.7626	32.6084	28.2993	28.0866	27.7789	32.7165	32.9234	27.9569	26.9173	26.7972	30.8644	32.612	26.3599
hsa-miR-155-5p	29.5399	30.8423	28.1583	29.4564	31.654	29.5886	33.4818	34.3685	33.5662	29.4923	29.1316	29.7989	30.9075	35.5075	29.1146	29.944	27.4139	32.1821	32.0084	31.8686
hsa-miR-502-3p	30.976	31.6593	31.3853	29.318	34.2739	29.6616	33.8768	34.1185	34.0584	32.7118	30.1196	28.8699	30.3965	36.4144	33.0326	30.741	29.7429	31.6811	33.4232	35.1132
hsa-miR-107	23.872	26.8258	23.9967	25.7642	26.7541	24.7042	25.2645	26.68	29.4706	24.2077	24.6056	24.7679	28.9035	29.776	24.1273	23.4213	24.1202	26.8734	28.6866	22.4918
hsa-miR-19b-3p	21.9141	23.3406	21.4677	22.0004	25.4934	21.5678	21.8855	23.5955	26.0676	23.2145	21.6976	20.3839	25.7575	26.8855	23.0642	19.7683	19.4792	22.6524	25.297	21.2269
hsa-miR-375	31.0649	30.3446	29.0787	30.9358	35.6269	31.6734	30.0985	31.4397	34.9085	34.4432	31.6846	29.3259	34.3425	34.5129	34.0205	30.4063	28.7102	32.1494	34.0699	31.925
hsa-miR-16-2-3p	28.0467	29.0213	28.0643	25.8233	32.026	26.8587	30.9128	30.8955	30.4137	29.3397	27.1486	26.1499	27.0955	33.3704	29.4281	28.109	26.4669	28.7761	29.9488	31.7861
hsa-miR-143-3p	26.3599	27.6878	25.0177	27.541	30.2908	27.3099	27.1585	29.1399	31.0289	27.8539	26.9616	26.6449	31.3635	30.7549	27.7715	25.0013	23.9782	28.8284	30.2045	25.8866
hsa-miR-130b-3p	29.2312	32.0113	29.8033	29.6955	32.4949	29.8845	34.2658	33.9335	34.2438	30.8106	29.6456	29.5229	30.9655	36.6307	30.1699	30.033	29.2979	32.3321	33.3441	32.8265
hsa-miR-532-5p	29.1525	30.1283	28.3243	28.0112	32.2895	28.0497	31.7368	32.1275	31.9766	30.6848	28.5836	27.5259	28.5905	34.9565	30.3359	29.19	27.2109	30.5481	31.834	33.2703
hsa-miR-361-5p	27.198	28.9713	26.7753	27.8978	29.6918	27.8457	31.9758	32.1785	31.9865	27.5206	27.0106	27.8249	29.1505	33.9261	27.6925	28.377	26.4599	29.9031	30.9167	30.2739
hsa-miR-486-5p	23.8547	23.9946	23.1997	22.5053	27.4579	22.5299	22.6895	24.5644	26.6098	25.1971	22.9876	21.3849	26.2495	27.7927	24.8143	20.5023	20.4822	23.7974	25.821	22.7834
hsa-miR-93-3p	29.3925	30.1813	28.7223	28.4724	32.4512	28.1507	32.2718	33.2275	32.8155	30.7136	28.7296	28.6779	29.1105	35.8209	30.3132	30.305	28.7819	31.7281	32.439	33.151
hsa-miR-125b-5p	28.2992	28.3446	27.3507	29.7005	32.4816	28.2173	28.1795	30.6192	33.1008	29.986	28.6356	27.8989	33.4895	32.7481	29.9548	28.7273	26.9222	30.9964	33.0616	28.6438
hsa-miR-210-3p	28.1878	29.2423	27.3883	26.5168	31.6481	27.4165	31.3948	31.5065	30.7366	29.5401	27.3446	26.3669	27.4235	33.9204	29.5297	27.938	27.2369	29.9761	30.2016	31.8282
hsa-miR-126-5p	25.8438	27.7435	25.5837	27.1	28.2122	26.8518	27.2655	28.7825	31.1574	25.7871	26.4836	26.6049	31.0875	30.6922	25.5476	25.5483	25.4272	28.5274	30.2022	23.9088
hsa-miR-29a-3p	26.6209	27.5794	26.1647	28.0166	30.3997	27.126	27.4255	29.1445	31.9072	28.1238	26.9796	27.8679	31.6985	31.4771	27.9237	25.3753	24.1602	27.8664	29.6263	26.1222
hsa-let-7d-5p	24.9425	26.7343	24.6603	26.2298	27.437	25.7821	29.0318	29.4285	29.953	25.3927	25.0536	24.9929	26.5835	32.1831	25.2427	26.672	26.1159	28.5491	29.8523	27.9007
hsa-miR-194-5p	29.4726	29.8853	29.1463	27.8159	33.7602	28.4763	31.4018	32.0295	33.6243	30.9356	29.2016	27.1759	29.2165	33.999	31.6042	30.242	28.7729	30.8821	32.1774	33.9077
hsa-let-7b-3p	32.0986	33.551	31.3407	33.2073	34.4737	31.2667	32.6085	33.8281	38.0086	32.6273	32.1256	32.7719	36.3255	36.5148	33.2754	30.7693	30.1342	34.4834	35.7957	31.431
hsa-miR-93-5p	23.3393	23.8056	22.5577	23.1307	26.6908	22.539	22.8075	24.6384	27.0494	24.5462	22.8706	21.4299	26.4535	28.019	24.2672	20.9083	20.8772	24.3824	26.5472	22.4554
hsa-miR-423-5p	25.4256	26.7261	24.8547	25.7644	28.3002	25.5878	26.3975	27.6315	29.8217	25.9801	25.5516	24.7479	29.7555	30.2901	25.7629	23.4353	23.3352	27.4164	28.6101	23.8619
hsa-miR-590-5p	27.4544	29.0053	26.7047	28.3532	30.3793	27.7132	28.2105	29.8186	32.2634	27.6878	27.6576	27.1159	31.4985	32.4317	27.904	25.7533	25.5972	29.0414	31.0762	25.9272
hsa-miR-362-3p	30.0536	31.2053	29.0123	28.9479	33.5935	29.1944	33.8008	32.8405	33.9811	31.3277	29.5146	29.2419	29.3475	35.6754	30.889	30.867	28.7119	31.0371	32.8655	33.3358
hsa-miR-484	26.466	28.8164	26.6567	27.6881	29.6296	27.1977	27.8055	29.5341	31.5062	27.3201	27.0386	26.5989	31.6775	31.7933	27.1562	25.8883	25.8692	29.4634	31.3645	25.71
hsa-miR-505-3p	29.2787	32.0013	28.8113	30.3009	32.504	29.6743	33.6808	33.4255	34.3815	30.5959	29.9106	29.2319	30.5225	36.2453	30.4741	30.852	29.2149	32.2601	33.6349	32.8871
hsa-miR-7-1-3p	30.2748	34.3813	31.6143	31.3822	33.2309	31.6268	34.9428	35.3345	35.1774	31.8401	30.2226	29.3319	31.6565	37.144	31.4201	32.131	30.4059	32.6371	34.0848	33.7345
hsa-miR-19a-3p	22.7991	23.8348	22.5777	22.673	26.1605	22.0964	22.8255	24.6615	26.7317	23.7751	22.5886	21.2289	26.2505	27.4621	23.5475	20.5523	20.4942	23.5594	25.9805	21.7356
hsa-miR-20a-5p	23.0756	23.7302	22.4937	22.6262	25.9908	22.7215	22.6765	25.562	26.6939	24.3644	23.0136	21.6979	26.3565	27.5268	23.5014	20.9453	20.7062	25.9034	26.0449	21.7252
hsa-miR-140-5p	27.5216	29.4993	27.2573	27.1472	30.5228	28.2824	32.3078	31.7455	31.7693	28.569	27.6736	27.3729	28.5645	33.8778	28.3774	28.732	26.4129	30.0091	30.8287	30.9951
hsa-miR-18a-5p	25.2025	27.3513	24.7553	24.6287	27.9941	25.2564	29.4468	29.2505	28.8453	25.9732	24.9216	24.6459	25.4335	31.7991	25.7419	26.219	25.4219	27.5741	28.8246	28.4397
hsa-miR-200a-3p	33.7114	32.1525	32.2167	32.9107	36.1371	35.2155	32.0685	37.9438	37.0308	34.0287	33.3486	35.2899	38.3185	36.7324	34.1621	31.6863	32.5112	35.4184	36.051	33.604
hsa-miR-92a-3p	22.5517	23.1143	22.0763	20.9151	25.493	21.3856	24.9438	25.0995	25.4283	23.4728	21.5866	20.4949	21.7315	28.093	23.2899	22.383	20.8829	23.5471	25.0141	25.8216
hsa-miR-320a	23.7122	24.7272	23.0657	23.989	26.8487	23.6815	24.0965	25.8054	27.9702	24.5103	23.7976	22.7319	27.8535	28.4451	24.3653	21.7733	21.7082	25.7014	26.8759	22.5565
hsa-miR-222-3p	25.9577	26.8466	25.3607	26.613	29.5538	26.1751	26.3695	27.8683	30.4937	27.2363	26.0666	25.2119	30.4345	30.3808	27.0724	24.3693	23.5242	27.9324	28.981	25.3635
hsa-miR-185-5p	22.9956	23.8719	22.4127	22.5297	26.5496	22.3351	22.8215	24.6916	26.4713	24.3474	22.7576	21.2979	26.4315	27.4488	24.0214	20.6213	20.7002	24.3724	26.0376	22.2773
hsa-miR-34a-5p	29.8032	29.1841	28.8957	29.9479	34.5078	29.4586	29.5485	31.2111	33.9297	33.4705	29.9766	29.0199	33.9665	33.2256	31.4366	28.8653	28.2952	32.1854	32.6003	29.9894
hsa-miR-106a-5p	22.9277	23.902	22.2507	23.2466	26.0042	22.8836	23.0685	24.7466	27.1861	23.7614	22.9416	21.8149	26.6265	27.9736	23.4536	21.3543	21.2232	24.6264	26.5412	21.765
hsa-miR-92b-3p	32.507	33.3233	31.7593	32.0229	34.8767	32.4796	36.2358	35.4495	36.3502	33.2833	32.0206	31.2869	32.7775	38.53	32.8415	33.819	33.3289	34.8071	37.1672	35.8254
hsa-miR-2110	30.9226	30.9283	30.6233	29.6344	33.2685	30.3332	34.5738	33.4855	34.399	31.0331	30.2876	29.3539	31.0765	36.825	31.0221	31.113	30.1809	33.6101	33.5626	33.6563
hsa-miR-320b	26.1608	26.921	25.7387	25.9511	28.8964	26.0307	26.3165	28.4315	29.9642	26.5589	26.1466	25.1089	30.3075	30.5809	26.253	24.0083	23.9982	28.0924	28.7609	24.5131
hsa-miR-574-3p	29.898	32.3033	29.2023	29.8801	31.782	29.7565	35.1958	33.8475	33.8209	29.5271	29.3356	32.3909	30.8185	36.0928	30.7921	30.892	30.1589	32.3471	33.2784	32.097
hsa-let-7g-5p	22.8518	23.9861	22.5297	23.5692	26.022	22.8181	22.9395	24.9908	27.129	23.8276	23.4016	22.0529	26.9855	28.0739	23.536	22.0693	21.4832	24.9874	27.1138	21.9073
hsa-miR-451a	20.216	20.5279	21.4846	20.7565	20.2374	18.313	19.2754	20.7565	18.4504	20.4551	19.7	19.6746	18.4504	19.0722	20.3539	17.963	18.2178	19.0722	17.2446	20.3282
hsa-miR-32-5p	26.4009	27.6123	25.9593	25.5578	28.8827	25.5579	29.9998	30.0485	30.0434	26.6752	25.7336	25.4189	26.5455	32.3527	26.8375	27.047	25.8419	28.0721	29.4328	29.4046
hsa-miR-132-3p	29.6381	30.8013	28.7613	29.0578	32.7757	29.4759	34.1068	33.5815	33.7653	31.0225	29.6816	29.6779	29.8315	35.4259	30.527	30.405	29.3109	32.0391	32.6369	33.1843
hsa-miR-497-5p	29.4968	29.5133	28.8743	29.535	32.975	29.5811	33.4548	33.4075	33.6563	30.8772	30.0216	29.4679	29.9165	35.5822	30.5461	31.625	29.4509	32.1181	33.3013	33.4862
hsa-miR-20b-5p	31.4798	33.0243	30.8973	28.0144	33.6237	29.2104	33.6868	33.9585	33.0735	31.2645	29.9406	29.0029	29.7775	35.7957	31.5918	30.496	30.5799	31.5351	31.9538	33.7352
hsa-miR-425-3p	28.6048	30.5613	28.2193	28.3963	30.9517	29.6965	33.3428	32.8965	32.7612	28.7239	28.3776	29.6379	30.1085	35.1376	28.6177	29.399	28.4869	31.3351	31.6877	31.3013
hsa-miR-22-3p	25.9221	27.7248	24.9957	26.3092	28.463	25.7098	26.4115	27.7178	29.7513	26.191	25.4296	25.5799	29.3565	30.7263	25.864	23.1483	24.6562	26.7874	28.7208	24.1049
hsa-miR-18b-5p	25.8713	27.2633	25.2527	26.3245	28.6395	26.0712	26.9205	28.0687	30.1627	26.4752	26.1596	25.3329	29.8125	31.1014	26.2771	24.5213	24.9462	27.9314	29.8819	24.6185
hsa-miR-223-5p	30.6878	31.7463	29.7883	30.1301	31.9863	31.1277	35.0528	33.8215	33.6517	30.1732	29.8936	29.2879	30.5305	35.6477	30.4826	30.581	28.2139	32.0911	32.8562	32.6563
hsa-miR-501-3p	32.4303	32.2213	30.8143	30.2088	35.341	32.0263	33.5448	34.5185	34.9028	32.3569	30.5926	30.0019	31.2875	37.0344	33.057	31.316	30.9439	32.5861	34.3064	35.0246
mmu-miR-378a-3p	28.2937	28.2983	27.0903	26.4232	31.3442	27.5297	31.0028	30.5265	30.7824	29.5045	27.3186	26.2339	27.6885	33.3257	29.2718	27.878	27.4709	29.1671	30.1078	31.7195
hsa-miR-532-3p	29.415	31.1553	29.4793	29.4237	32.8852	28.9275	32.4438	32.3875	33.3636	30.6341	29.4576	28.7879	30.2085	35.4601	30.638	30.272	28.1179	31.3641	33.063	33.4216
hsa-miR-7-5p	31.1838	31.6653	30.7473	28.6005	34.5822	29.9878	34.1338	33.4955	33.109	32.1319	29.8826	29.9919	29.9435	35.6679	31.6157	31.691	30.0929	32.1081	33.1956	34.7581
hsa-miR-421	29.4476	32.3293	29.5073	30.144	31.7343	31.1521	34.5098	34.1565	34.5695	30.1236	32.0666	32.0009	30.5915	36.4612	29.8336	30.874	30.1619	32.8301	33.289	32.2378
hsa-miR-29c-3p	26.3171	27.2713	26.2173	24.7133	29.0468	25.5487	29.5878	29.5435	29.1927	26.9804	25.5056	25.2589	26.2995	32.018	26.806	26.339	24.7849	27.4191	28.0315	29.2499
hsa-let-7b-5p	23.6514	24.0427	23.2907	23.27	26.4642	22.9088	23.0665	25.3537	26.9857	24.4136	23.3746	21.8429	26.9205	27.9932	24.1021	21.9463	21.9092	25.2244	27.1152	22.2598
hsa-let-7c-5p	26.2606	28.2163	26.3923	26.3229	28.0095	26.8774	30.6558	31.1565	30.2437	25.7533	27.2886	27.0749	28.4175	32.5496	25.8808	27.836	27.2919	29.7871	30.0318	28.4417
hsa-miR-148a-3p	26.3313	27.9166	25.7177	26.3533	29.1756	26.5726	27.5585	28.7131	30.6458	26.6528	26.6866	26.3499	30.2675	30.6386	26.4683	24.6863	24.1962	27.4484	29.123	24.7796
hsa-miR-26b-5p	25.3063	26.5286	25.1957	25.6179	27.9623	25.2816	25.5655	27.7071	29.458	25.599	25.5666	24.7469	29.5795	29.9592	25.4215	24.5553	24.3602	27.4664	29.1974	23.6858
hsa-miR-100-5p	32.2282	31.0133	29.2723	30.4264	34.2441	31.2094	34.9688	32.9075	34.3412	31.7753	30.3536	30.6179	30.7145	36.0308	32.1031	33.611	30.8169	31.8801	33.7352	35.4156
hsa-miR-877-5p	30.3465	33.8923	31.0023	30.2431	33.4703	31.0147	35.5328	33.4765	34.9875	31.3332	30.7886	31.3069	31.4885	37.0109	31.2781	31.862	30.3149	33.4321	33.3373	33.6407
hsa-miR-106b-5p	24.1277	25.1533	23.7933	22.2648	26.9469	23.151	27.0698	27.0645	26.5254	24.8394	23.4696	22.5789	23.5925	29.5433	24.8288	25.2	23.5079	25.7221	26.6983	27.4021
hsa-miR-101-3p	24.4991	25.3674	24.3757	23.8602	27.6987	23.9007	24.4305	26.7427	27.8187	25.508	24.4186	23.1429	28.0465	28.7336	25.2445	22.4943	22.3862	25.5844	27.371	23.5766
hsa-miR-186-5p	29.2164	31.3376	29.9667	29.7757	32.106	29.6095	30.1825	31.6846	33.4506	29.925	29.6046	29.0319	33.8195	33.9366	29.5907	28.3093	28.4242	31.8694	33.22	28.0886
hsa-miR-200c-3p	29.8141	30.6743	28.9293	30.1058	32.5848	30.996	33.9738	33.9525	34.5176	30.4361	30.5776	30.4409	30.1165	35.5694	30.3619	31.893	30.0089	32.7691	33.5501	32.9745
hsa-miR-141-3p	29.7591	29.1963	27.9933	28.9998	32.9256	29.6252	32.3948	32.0015	32.9046	31.5496	30.2676	28.2079	29.4195	34.6134	31.0149	31.315	29.1779	30.9501	32.5003	33.5113
hsa-miR-15a-5p	22.5946	23.1593	22.1603	20.755	24.8812	21.7422	25.1808	25.3675	25.0403	22.8643	21.7936	21.0509	21.9825	27.9526	22.8774	22.458	21.4129	23.6301	24.6935	25.3146
hsa-miR-320d	28.2312	28.9327	28.3017	28.244	31.1485	27.7366	28.5505	30.3639	32.0376	29.0646	28.2296	27.3609	32.1415	32.6067	28.4609	26.2453	26.9412	29.8014	30.5965	26.7821
hsa-miR-21-5p	22.4517	23.7883	22.1113	21.8192	24.2462	22.3953	26.1638	25.9155	26.1807	22.1003	22.1526	21.9639	23.1175	28.0173	22.0351	24.313	21.6519	24.4871	25.2449	24.6688
hsa-miR-17-5p	28.3305	29.8944	27.9427	27.7536	30.2712	28.446	28.6235	30.4203	31.7452	28.2162	28.3736	28.0869	32.0855	32.6353	28.0038	26.8453	27.4712	30.2474	31.2963	26.1358
hsa-miR-320c	27.6283	28.7653	27.2103	25.475	29.3831	27.0082	31.0638	30.5105	30.0331	27.1646	26.6986	26.5859	27.7625	32.5759	27.2007	27.473	26.6009	29.4911	28.8091	29.8257
hsa-miR-15b-5p	26.5557	28.1153	26.7273	25.0311	27.6248	26.8226	30.4738	30.3085	30.0169	25.4894	27.3086	26.7919	27.4605	31.9405	25.515	27.372	26.8249	28.5681	29.0207	27.992
hsa-miR-10b-5p	29.569	29.2815	28.1427	29.1382	33.2858	29.4129	29.0675	30.7001	33.3909	31.7506	30.1606	28.8099	33.3835	32.6857	31.4657	29.2343	27.7372	30.6094	32.402	29.7613
hsa-miR-144-3p	23.4833	22.7707	22.7087	21.969	26.5409	21.5517	21.6165	23.5964	25.6867	24.3575	23.1286	20.5719	25.4545	26.5701	24.326	22.2173	21.9672	23.4484	26.1556	22.3154
hsa-miR-144-5p	28.645	27.8213	28.6763	26.6201	31.6605	27.8638	29.5758	30.5595	30.8837	29.4314	28.8256	26.6419	27.3885	32.96	29.8749	30.042	27.3589	28.9101	30.922	31.7924
hsa-miR-30a-5p	29.6721	29.2773	28.6287	29.7825	33.1795	29.4546	29.8115	31.032	33.7358	31.5754	30.6196	28.2869	33.7365	32.667	30.8111	29.4893	28.2782	31.6844	32.7278	29.5242
hsa-miR-424-5p	27.5063	27.6714	27.0677	26.18	30.18	27.2184	27.1375	28.7902	30.1694	27.8868	27.4136	26.4829	31.0365	30.3861	27.7989	25.4863	24.3552	28.0464	29.3197	25.9259

## Sheet: 53 miRNAs significantly altered
miRNAs
hsa-miR-652-3p
hsa-miR-181a-5p
hsa-miR-106a-5p
hsa-miR-221-3p
hsa-miR-93-5p
hsa-miR-324-5p
hsa-miR-185-5p
hsa-let-7e-5p
hsa-miR-486-5p
hsa-miR-143-3p
hsa-miR-222-3p
hsa-miR-342-3p
hsa-miR-25-3p
hsa-miR-128-3p
hsa-let-7b-3p
hsa-miR-16-5p
hsa-miR-424-5p
hsa-miR-107
hsa-miR-197-3p
hsa-miR-146a-5p
hsa-miR-148b-3p
hsa-miR-590-5p
hsa-miR-191-5p
hsa-miR-17-5p
hsa-miR-30d-5p
hsa-miR-186-5p
hsa-miR-320b
hsa-miR-301a-3p
hsa-miR-338-3p
hsa-miR-223-3p
hsa-miR-151a-5p
hsa-miR-423-5p
hsa-miR-101-3p
hsa-miR-23a-3p
hsa-miR-215-5p
hsa-miR-320a
hsa-miR-192-5p
hsa-let-7d-3p
hsa-miR-126-5p
hsa-miR-19a-3p
hsa-miR-148a-3p
hsa-miR-18b-5p
hsa-miR-24-3p
hsa-miR-335-5p
hsa-miR-320d
hsa-let-7g-5p
hsa-miR-22-3p
hsa-miR-199a-3p
hsa-miR-19b-3p
hsa-miR-29a-3p
hsa-miR-150-5p
hsa-miR-20a-5p
hsa-miR-34a-5p
